# Supplementary material
Source: PubMed Central journal article supplement (PMC6392016)
Supplement: NIHMS1519120-supplement-1.pdf [file NIHMS1519120-supplement-1.pdf]

## Supporting Information – Part 1 (SI-1)

### Apex marine predators and ocean health: proactive screening of halogenated organic contaminants reveals ecosystem indicator species

Jennifer M. Cossaboon<sup>a</sup>, Eunha Hoh<sup>a</sup>, Susan J. Chivers<sup>b</sup>, David W. Weller<sup>b</sup>, Kerri Danil<sup>b</sup>, Keith A. Maruya<sup>c</sup>, and Nathan G. Dodder<sup>a1</sup>

<sup>a</sup>School of Public Health, San Diego State University, San Diego, CA 92182; <sup>b</sup>Southwest Fisheries Science Center, National Oceanographic and Atmospheric Administration, La Jolla, CA 92037; and <sup>c</sup>Southern California Coastal Water Research Project Authority, Costa Mesa, CA 92626, USA

### Automated Data Reduction Strategy

#### Halogenation Filter Optimization

Data reduction software was developed based on the algorithm described by Pena-Abaurrea et al. (2014)<sup>1</sup>, which classified isotopic clusters in mass spectra as either halogenated (containing bromine and/or chlorine) or non-halogenated using eleven rules that examined the ion intensity ratios<sup>1</sup>. The original algorithm was re-written in the R programming language and optimized (as described below) by comparison against manual analysis. One sample from each species was selected (5 samples total), and each deconvoluted chromatographic peak and corresponding mass spectrum (average of 9210 features per sample) was manually inspected for the presence of chlorine and/or bromine.

The original algorithm was modified by the addition of three rules that increased the overall efficiency by minimizing the false positive rate. First, isotopic distributions identified by the original algorithm as halogenated were compared against theoretical bromine (n=1 to 10), chlorine (n=1 to 10), and bromine plus chlorine (all combinations of 1 to 5 bromines and 1 to 5 chlorines) using a dot product based spectral similarity score. The closest matching halogen

content was selected. If the experimental isotopic cluster had a similarity score  $< 0.85$  against the closest matching theoretical distribution, the experimental isotopic cluster was specified as non-halogenated. Second, any experimental isotopic clusters matching  $Cl_1$  were specified as non-halogenated. This simple cluster frequently matches non-halogenated ion clusters and lead to an unacceptably high false positive rate. Third, for a compound to be specified as halogenated, it was required that at least two isotopic clusters in the mass spectrum met the above criteria, since prior work demonstrated that bioaccumulative HOCs typically contain more than one halogen<sup>2</sup>.

The original algorithm identified an average of 2093 halogenated spectra/sample. Application of the three additional rules reduced the average number of spectra to 479 per sample. This reduction in false positives and the resulting average number of mass spectra per sample enabled non-targeted analysis of all 25 samples within a reasonable timeframe. An additional crosschecking procedure was developed that required mass spectra (with the same retention times) present in  $> 2$  samples to be manually searched in the remaining 23 samples. Crosschecking resulted in a final detection rate of 80-85% compared to a fully manual process (Table S3). It is recognized that the automated method had a higher false negative rate compared to full manual review, however compromise was required in order to meet the efficiency requirements of analyzing 25 samples. Core components of the R script are provided below (Code 1 and 2), and the full script is provided at <https://github.com/OrgMassSpec/IdentifyHalogenatedSpectra>.

### Compound Identification

GC×GC/TOF-MS data was processed within the LECO ChromaTOF mass spectrometer data system using automatic peak finding and electron impact fragmentation mass spectral deconvolution with a signal-to-noise threshold (S/N) of 50 or higher. The optimized halogenation filtering script was applied to all 25 samples for halogenation screening. The chromatographic peaks and corresponding mass spectra selected by the filter were manually reviewed and halogenated compounds were structurally identified by searches against existing mass spectral libraries<sup>2,3</sup> including the NIST 2014 Electron Impact Mass Spectral Library, matches to authentic reference standards, or manual interpretation. The crosschecking procedure was then performed on true positives appearing in more than two samples (Figure S4). Compound relative abundances were calculated using methods established by Shaul et al. (2014). Differences in contaminant loads between marine mammal species were analyzed via statistical comparisons in R<sup>4,5</sup> using hierarchical clustering displayed as heat maps<sup>6</sup>, as well as box and whisker diagrams<sup>7</sup> to display the distribution of compound structural class abundances.

**Table S1.** Structural class descriptions for HOCs detected in the five SCB marine mammal species.

| Structural Class             | Constituents                                      | Source and Description                                                                                                                |
|------------------------------|---------------------------------------------------|---------------------------------------------------------------------------------------------------------------------------------------|
| B/CDE                        | Brominated/chlorinated diethers                   | Limited data; previously detected in wastewater treatment plant drying lagoons <sup>8</sup> and e-waste recycling plants <sup>9</sup> |
| Brominated anisole           |                                                   | Mixed natural and anthropogenic <sup>2</sup>                                                                                          |
| Chlordane-related            | Chlordane-related compounds                       | Legacy organochlorine insecticide formulation                                                                                         |
| Chlorinated benzene          | Chlorinated benzenes                              | Solvent for pesticide formulations and chemical manufacturing                                                                         |
| Chlorinated styrene          | Chlorinated styrenes                              | Derived from styrene, an industrial chemical used in manufacturing (still in use)                                                     |
| DDT-related                  | Dichlorodiphenyltrichloroethane-related compounds | Legacy pesticide and associated degradation products                                                                                  |
| Dichlorobenzophenone         | 4,4'-dichlorobenzophenone                         | Degradation product of dicofol and DDT pesticides <sup>10,11</sup>                                                                    |
| Dieldrin                     |                                                   | Legacy insecticide                                                                                                                    |
| DMBP                         | Dimethyl bipyroles                                | Nitrogen-containing heterocyclic compounds with no known anthropogenic sources, suspected to be natural products <sup>12</sup>        |
| HCH-related                  | Hexachlorocyclohexane-related compounds           | Legacy insecticide                                                                                                                    |
| Heptachlor-related           | Heptachlor-related compounds                      | Legacy insecticide                                                                                                                    |
| MBP                          | Methyl bipyroles                                  | Nitrogen-containing heterocyclic compounds suspected to be natural products <sup>12</sup>                                             |
| MeO-B/CDE                    | Methoxy brominated/chlorinated diphenyl ethers    | Suspected natural product <sup>13</sup>                                                                                               |
| MeO-BDE                      | Methoxy brominated diphenyl ethers                | Only known natural sources; isolated from marine algae, sponges, and bacteria <sup>14</sup>                                           |
| MeO-CDE                      | Methoxy chlorinated diphenyl ethers               | Unknown, hydroxyl analogues identified as impurities in technical pentachlorophenol <sup>15</sup>                                     |
| MeO-PBB                      | Methoxy polybrominated biphenyls                  | Natural sources <sup>2</sup>                                                                                                          |
| Methylenebistrichloroanisole | Methylene bis(trichloro)anisole                   | Methylated version of hexachlorophene disinfectant (banned in 1972)                                                                   |
| Methylsulfonyl-PCB           | Methylsulfonyl polychlorinated biphenyls          | PCB metabolites <sup>16</sup>                                                                                                         |
| Mirex-related                | Mirex-related compounds                           | Legacy pesticide and flame retardant                                                                                                  |
| PBB                          | Polybrominated biphenyls                          | Flame retardants                                                                                                                      |
| PBDE                         | Polybrominated diphenyl ethers                    | Flame retardants                                                                                                                      |
| PBHD                         | Polybrominated hexahydroxanthenes                 | Only known natural sources <sup>17</sup>                                                                                              |
| PCT                          | Polychlorinated terphenyls                        | Flame retardants <sup>18</sup>                                                                                                        |
| Pyrrolidinecarbonyl chloride |                                                   | Synthetic precursor to a carbamate fungicide <sup>19</sup>                                                                            |

|                        |                                                           |                                                                                                                                                                                                                     |
|------------------------|-----------------------------------------------------------|---------------------------------------------------------------------------------------------------------------------------------------------------------------------------------------------------------------------|
| TCPM                   | Tris(4-chlorophenyl)methanes                              | Possible industrial sources, suspected minor constituent in technical DDT and dicofol <sup>20,21</sup>                                                                                                              |
| TCPMOH                 | Tris(4-chlorophenyl)methanol                              | Presumed primary breakdown product of TCPM <sup>22</sup>                                                                                                                                                            |
| Toxaphene              | Toxaphenes                                                | Legacy pesticide                                                                                                                                                                                                    |
| Unknown                | Miscellaneous unknown compounds                           | Unknown                                                                                                                                                                                                             |
| Unknown-3              | Unknown compounds with similar fragmentation ion clusters | Previously detected in Atlantic dolphin blubber <sup>2</sup> , fish oil supplements <sup>23</sup> , a Mediterranean sponge <sup>17</sup> , and passive samplers deployed along the Great Barrier Reef <sup>24</sup> |
| Unknown-4              | Unknown compounds with similar fragmentation ion clusters | Suspected to be polychlorinated diphenyl ethers or hydroxyl PCBs <sup>2</sup>                                                                                                                                       |
| Unknown-5 to Unknown-8 | Unknown compounds with similar fragmentation ion clusters | Unknown                                                                                                                                                                                                             |

**Table S2.** Sample collection details. All samples were acquired from the Marine Mammal Life History Archive of the NOAA National Marine Fishery Service, Southwest Fisheries Science Center (SWFSC), in La Jolla, California.

| Sample ID | Specimen ID  | Common Name                 | Source*   | Length (cm) | Standard Length? | Collection Year | Latitude  | Longitude   |
|-----------|--------------|-----------------------------|-----------|-------------|------------------|-----------------|-----------|-------------|
| MMCP 1    | DWJ0022      | Harbor seal                 | Fishery   | 121         | Y                | 1991            | 33.096666 | -117.343333 |
| MMCP 2    | MAI0004      | Risso's dolphin             | Fishery   | 252         | Y                | 1993            | 32.418333 | -118.146666 |
| MMCP 3    | DFP0099      | Risso's dolphin             | Fishery   | 254         | N                | 1993            | 32.728333 | -118.981666 |
| MMCP 4    | SCB0076      | Harbor seal                 | Fishery   | 97          | Y                | 1992            | 33.6      | -117.945    |
| MMCP 5    | RAC0011      | California sea lion         | Fishery   | 204         | Y                | 1997            | 32.656666 | -118.028333 |
| MMCP 6    | SMC0023      | Long-beaked common dolphin  | Fishery   | 218         | Y                | 1997            | 33.321666 | -117.886666 |
| MMCP 7    | AXR0005      | Risso's dolphin             | Fishery   | 203         | Y                | 1997            | 32.861666 | -117.501666 |
| MMCP 8    | CMN0011      | Long-beaked common dolphin  | Fishery   | 235         | N                | 1997            | 34.968333 | -120.918333 |
| MMCP 9    | KSS0010      | Short-beaked common dolphin | Fishery   | 194         | Y                | 2008            | 32.723333 | -117.43     |
| MMCP 10   | LSE0064      | Short-beaked common dolphin | Fishery   | 188         | Y                | 1996            | 32.483333 | -118.725    |
| MMCP 11   | MSK0045      | Short-beaked common dolphin | Fishery   | 187         | Y                | 1991            | 32.323333 | -117.795    |
| MMCP 12   | JCP0025      | California sea lion         | Fishery   | 224         | n.d.             | 2000            | 32.57     | -117.99     |
| MMCP 13   | KMP0047      | Harbor seal                 | Fishery   | 110         | Y                | 1994            | 34.116666 | -119.268333 |
| MMCP 14   | MJK0048      | Short-beaked common dolphin | Fishery   | 188         | Y                | 1999            | 32.715    | -117.85     |
| MMCP 15   | BXD0026      | California sea lion         | Fishery   | 227         | N                | 2004            | 32.645    | -117.635    |
| MMCP 16   | MSK0056      | Risso's dolphin             | Fishery   | 219         | n.d.             | 1992            | 34.435    | -121.061666 |
| MMCP 17   | KXD0197      | Long-beaked common dolphin  | Stranding | 226.7       | y                | 2011            | 32.62575  | -117.139166 |
| MMCP 18   | JBG0017      | California sea lion         | Fishery   | 209         | Y                | 1997            | 33.518333 | -117.88     |
| MMCP 19   | JNB0038      | California sea lion         | Fishery   | 207         | Y                | 1999            | 32.598333 | -117.778333 |
| MMCP 20   | SWC-Dc-1401B | Long-beaked common dolphin  | Stranding | 211.8       | y                | 2014            | 32.865565 | -117.25538  |
| MMCP 21   | KXD0066      | Long-beaked common dolphin  | Stranding | 200         | N                | 2004            | 33.216666 | -117.383333 |
| MMCP 22   | FHM0001      | Harbor seal                 | Fishery   | 99          | Y                | 1990            | 32.551666 | -117.171666 |
| MMCP 23   | RGH0129      | Harbor seal                 | Fishery   | 92          | Y                | 1994            | 34.173333 | -119.373333 |
| MMCP 24   | DKG0002      | Short-beaked common dolphin | Fishery   | 196         | Y                | 2000            | 32.331666 | -117.725    |
| MMCP 25   | EAF0001      | Risso's dolphin             | Fishery   | 243         | Y                | 1993            | 34.121666 | -121.946666 |

\*Fishery = fishery by-catch

n.d. = no data

**Table S3.** Comparison of total number of HOCs (including PCBs) identified by manual analysis, the optimized filtering script, and cross-checking of filtering script results in a subset of five samples.

| Species                           | Sample  | No. HOCs Identified Manually | No. HOCs Identified by Filtering Script | No. HOCs Identified after Cross-checking |
|-----------------------------------|---------|------------------------------|-----------------------------------------|------------------------------------------|
| Long-beaked common dolphin        | MMCP 8  | 159                          | 108 (68%)                               | 134 (84%)                                |
| Short-beaked common dolphin       | MMCP 10 | 170                          | 121 (71%)                               | 144 (85%)                                |
| Risso's dolphin                   | MMCP 2  | 149                          | 95 (64%)                                | 119 (80%)                                |
| California sea lion               | MMCP 15 | 117                          | 76 (65%)                                | 94 (80%)                                 |
| Harbor seal                       | MMCP 13 | 67                           | 41 (61%)                                | 57 (85%)                                 |
| Pacific common bottlenose dolphin | n=8     | *206                         |                                         |                                          |

\*This number represents the average from eight samples analyzed by Shaul et al., 2014 and excludes PCBs.

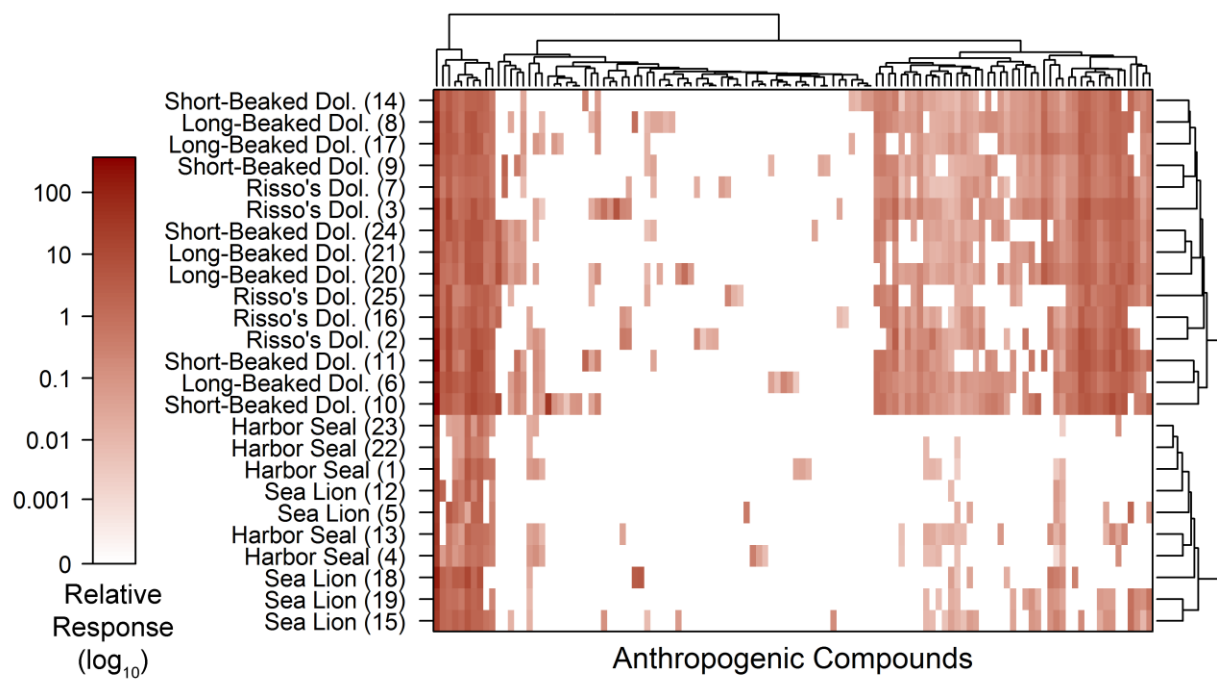

**Figure S1.** Heat map illustrating hierarchical clustering results for all 25 samples based upon detection and relative abundance of HOCs from anthropogenic sources.



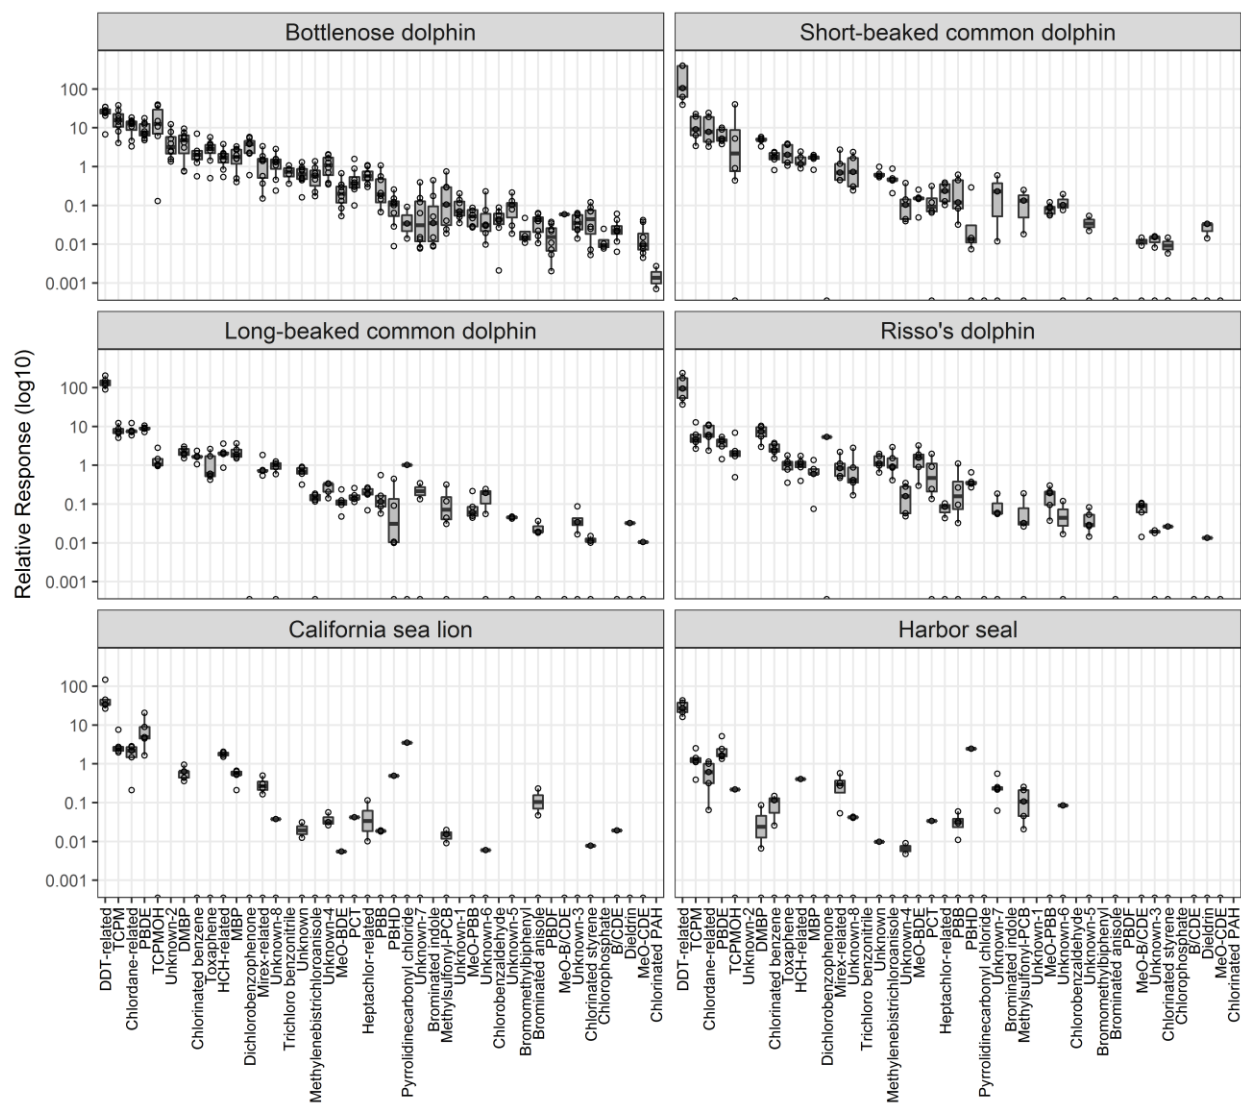

**Figure S2.** Summed relative abundances of HOCs by structural class for each species, including Pacific common bottlenose dolphin profile from Shaul et al., 2014.

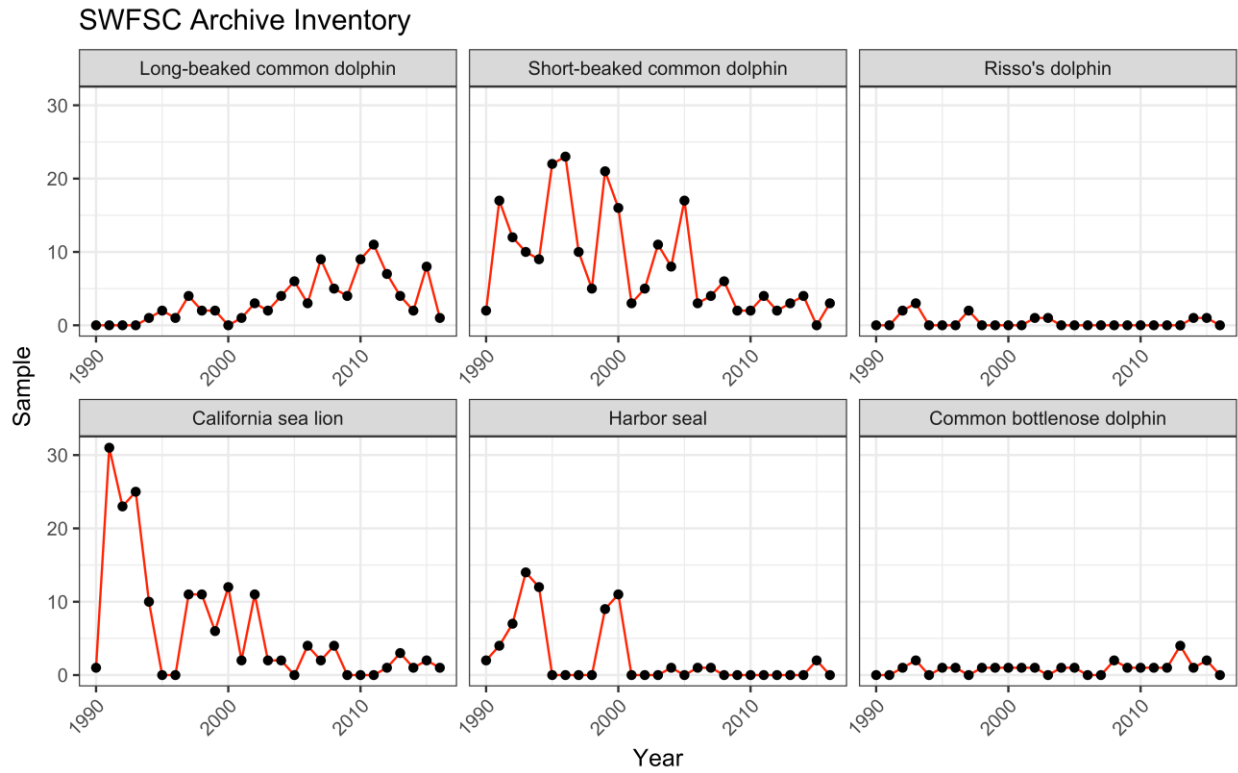

**Figure S3.** Inventory of full-depth blubber specimens from male individuals (all age groups, stranding and fisheries sources) of the six proposed sentinel species collected from the Southern California Bight (1990–2016).

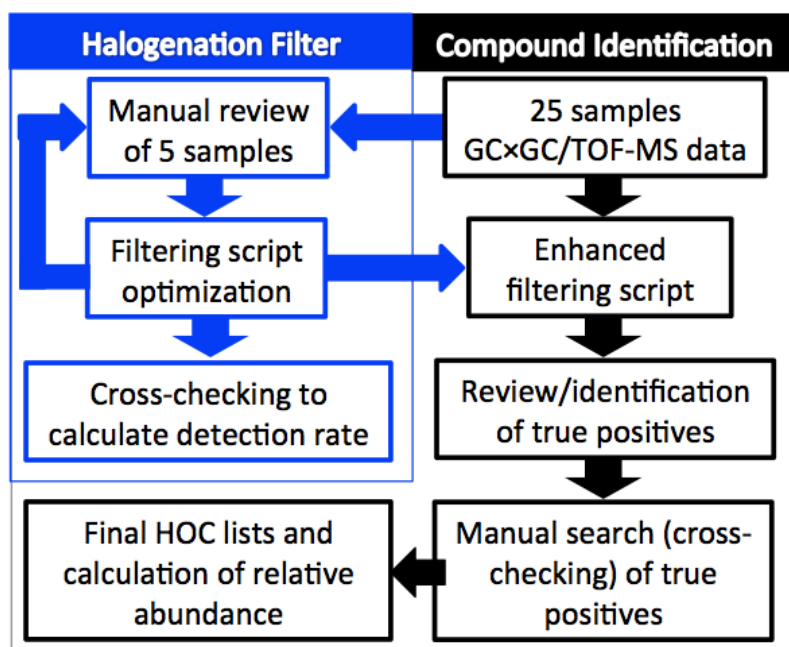

**Figure S4.** Flowchart of automated data handling and compound identification procedure.

**Code 1. Halogenation Search Filter. Full description of a working script is available at <http://orgmassspec.github.io/IdentifyHalogenationScript.html>.**

```
ProcessSpectrum <- function(x) {  
  
  # Normalize peak intensity to percentage of max peak.  
  x$percentIntensity <- with(x, intensity / max(intensity) * 100)  
  
  x$Filter <- FALSE  
  
  x <- x[x$mz > 100, ]  
  
  for(i in (nrow(x) - 6):5) {  
  
    if(x$percentIntensity[i] > 3) {  
  
      # Calculate peak ratios.  
  
      peakRatio1 <- x$percentIntensity[i + 1] / x$percentIntensity[i]  
      peakRatio2 <- x$percentIntensity[i + 2] / x$percentIntensity[i]  
      peakRatio3 <- x$percentIntensity[i + 3] / x$percentIntensity[i]  
      peakRatio4 <- x$percentIntensity[i + 4] / x$percentIntensity[i]  
      peakRatio5 <- x$percentIntensity[i + 5] / x$percentIntensity[i]  
      peakRatio6 <- x$percentIntensity[i + 6] / x$percentIntensity[i]  
      peakRatioa <- x$percentIntensity[i - 1] / x$percentIntensity[i]  
      peakRatiob <- x$percentIntensity[i - 2] / x$percentIntensity[i]  
      peakRatioc <- x$percentIntensity[i - 4] / x$percentIntensity[i]  
  
      # Determine if peak ratios pass rules.  
  
      if(peakRatio1 < 0.5 & peakRatio1 > 0.003 & # Rule 1  
        peakRatio2 > 0.225 & peakRatio2 <= 1 & # Rule 2  
        peakRatio1 < peakRatio2 & # Rule 3  
        peakRatio3 < 0.5 & peakRatio3 > 0.001 & # Rule 4  
        peakRatio3 < peakRatio1 & # Rule 5  
        peakRatio4 < peakRatio2 & # Rule 6  
        peakRatio5 < peakRatio1 & # Rule 7  
        peakRatio6 < peakRatio2 & # Rule 8  
        peakRatioa < 0.5 & # Rule 9  
        peakRatiob < 1 & # Rule 10  
        peakRatioc < 1) { # Rule 11  
  
        x$Filter[i] <- TRUE  
  
      }  
  
    } # encloses filter  
  
  } # encloses for loop that iterates through each m/z  
  
  # Returns TRUE if compound is halogenated.  
}
```

## Code 2. Additional Rules.

```
x <- x[x$Theory_PercentIntensity != 0, ] #Error check

# Apply additional filters.

# Rule 1. Exclude C11 isotopic clusters.
x <- x[x$DistributionLabel != 'C11', ]

# Rule 2. Clusters must be at least 85% similar to theoretical distribution.
x <- x[x$SimilarityScore > 0.85, ]

# Rule 3. Select only the spectra with > 1 halogenated fragment per spectrum.
y <- setNames(aggregate(Expt_mz ~ Spectrum, data = x, FUN = length),
c('Spectrum', 'Count'))
countFilter <- y$Spectrum[y$Count > 1]
x <- x[x$Spectrum %in% countFilter, ]
```

## References

- (1) Pena-Abaurrea, M.; Jobst, K. J.; Ruffolo, R.; Shen, L.; McCrindle, R.; Helm, P. A.; Reiner, E. J. Identification of Potential Novel Bioaccumulative and Persistent Chemicals in Sediments from Ontario (Canada) Using Scripting Approaches with GC×GC-TOF MS Analysis. *Environ. Sci. Technol.* **2014**, *48* (16), 9591–9599.
- (2) Shaul, N. J.; Dodder, N. G.; Aluwihare, L. I.; Mackintosh, S. A.; Maruya, K. A.; Chivers, S. J.; Danil, K.; Weller, D. W.; Hoh, E. Nontargeted Biomonitoring of Halogenated Organic Compounds in Two Ecotypes of Bottlenose Dolphins (*Tursiops truncatus*) from the Southern California Bight. *Environ. Sci. Technol.* **2015**, *49* (3), 1328–1338.
- (3) Mackintosh, S. A.; Dodder, N. G.; Shaul, N. J.; Aluwihare, L. I.; Maruya, K. A.; Chivers, S. J.; Danil, K.; Weller, D. W.; Hoh, E. Newly Identified DDT-Related Compounds Accumulating in Southern California Bottlenose Dolphins. *Environ. Sci. Technol.* **2016**, *50* (22), 12129–12137.
- (4) R Core Team. *R: A Language and Environment for Statistical Computing*; R Foundation for Statistical Computing: Vienna, Austria, 2017.
- (5) Wickham, H.; Francois, R.; Henry, L.; Müller, K. *Dplyr: A Grammar of Data Manipulation*; 2017.
- (6) Sarkar, D.; Andrews, F. *LatticeExtra: Extra Graphical Utilities Based on Lattice*; 2016.
- (7) Wickham, H. *Ggplot2: Elegant Graphics for Data Analysis*; Springer-Verlag: New York, 2009.
- (8) La Guardia, M. J.; Hale, R. C.; Harvey, E.; Chen, D. Flame-Retardants and Other Organohalogenes Detected in Sewage Sludge by Electron Capture Negative Ion Mass Spectrometry. *Environ. Sci. Technol.* **2010**, *44* (12), 4658–4664.
- (9) Yu, Z.; Zheng, K.; Ren, G.; Wang, D.; Ma, S.; Peng, P.; Wu, M.; Sheng, G.; Fu, J. Identification of Monochloro-Nonabromodiphenyl Ethers in the Air and Soil Samples from South China. *Environ. Sci. Technol.* **2011**, *45* (7), 2619–2625.
- (10) Bumpus, J. A.; Aust, S. D. Biodegradation of DDT [1,1,1-Trichloro-2,2-Bis(4-Chlorophenyl)Ethane] by the White Rot Fungus *Phanerochaete chrysosporium*. *Appl. Environ. Microbiol.* **1987**, *53* (9), 2001–2008.
- (11) Thiel, A.; Guth, S.; Böhm, S.; Eisenbrand, G. Dicofol Degradation to p,P'-Dichlorobenzophenone – A Potential Antiandrogen. *Toxicology* **2011**, *282* (3), 88–93.
- (12) Teuten, E. L.; Pedler, B. E.; Hangsterfer, A. N.; Reddy, C. M. Identification of Highly Brominated Analogues of Q1 in Marine Mammals. *Environ. Pollut.* **2006**, *144* (1), 336–344.
- (13) Malmvärn, A.; Marsh, G.; Kautsky, L.; Athanasiadou, M.; Bergman, Å.; Asplund, L. Hydroxylated and Methoxylated Brominated Diphenyl Ethers in the Red Algae *Ceramium tenuicorne* and Blue Mussels from the Baltic Sea. *Environ. Sci. Technol.* **2005**, *39* (9), 2990–2997.
- (14) Agarwal, V.; El Gamal, A. A.; Yamanaka, K.; Poth, D.; Kersten, R. D.; Schorn, M.; Allen, E. E.; Moore, B. S. Biosynthesis of Polybrominated Aromatic Organic Compounds by Marine Bacteria. *Nat. Chem. Biol.* **2014**, *10* (8), 640–647.

- (15) Deinzer, M.; Lamberton, J.; Griffin, D.; Miller, T. Isolation of Hydroxynonachlorodiphenyl Ethers from Pentachlorophenol. Mass Spectrometry of Hydroxynonachlorodiphenyl Ethers and Their Methylated Derivatives. *Biol. Mass Spectrom.* **1978**, *5* (10), 566–571.
- (16) Fängström, B.; Athanasiadou, M.; Grandjean, P.; Weihe, P.; Bergman, A. Hydroxylated PCB Metabolites and PCBs in Serum from Pregnant Faroese Women. *Environ. Health Perspect.* **2002**, *110* (9), 895.
- (17) Melcher, J.; Janussen, D.; Garson, M. J.; Hiebl, J.; Vetter, W. Polybrominated Hexahydroxanthene Derivatives (PBHDs) and Other Halogenated Natural Products from the Mediterranean Sponge *Scalariispongia scalaris* in Marine Biota. *Arch. Environ. Contam. Toxicol.* **2007**, *52* (4), 512–518.
- (18) Filyk, G. PCTs\_UECE.Pdf. *U. N. Econ. Comm. Eur.* **2011**, 1–29.
- (19) Katz, L. E. Selected 2-Trichloromethyl-4-Pyrimidinyl Carbamates and Their Use as Fungicides. EP0100795, 1984.
- (20) Buser, H. R. DDT, a Potential Source of Environmental Tris(4-Chlorophenyl)Methane and Tris(4-Chlorophenyl)Methanol. *Environ. Sci. Technol.* **1995**, *29* (8), 2133–2139.
- (21) de Boer, J. Environmental Distribution and Toxicity of Tris(4-Chlorophenyl)Methanol and Tris(4-Chlorophenyl)Methane. In *Reviews of Environmental Contamination and Toxicology*; 1997; Vol. 150, pp 95–106.
- (22) Zook, D. R.; Buser, H. R.; Bergqvist, P.-A.; Rappe, C.; Olsson, M. Detection of Tris(Chlorophenyl)Methane and Tris(4-Chlorophenyl)Methanol in Ringed Seal (*Phoca hispida*) from the Baltic Sea. *Ambio* **1992**, *21* (8), 557–560.
- (23) Hoh, E.; Lehotay, S. J.; Mastovska, K.; Ngo, H. L.; Vetter, W.; Pangallo, K. C.; Reddy, C. M. Capabilities of Direct Sample Introduction–Comprehensive Two-Dimensional Gas Chromatography–Time-of-Flight Mass Spectrometry to Analyze Organic Chemicals of Interest in Fish Oils. *Environ. Sci. Technol.* **2009**, *43* (9), 3240–3247.
- (24) Rosenfelder, N.; Van Zee, N. J.; Mueller, J. F.; Gaus, C.; Vetter, W. Gas Chromatography/Electron Ionization-Mass Spectrometry-Selected Ion Monitoring Screening Method for a Thorough Investigation of Polyhalogenated Compounds in Passive Sampler Extracts with Quadrupole Systems. *Anal. Chem.* **2010**, *82* (23), 9835–9842.
